# TNF-Alpha rs1800629 Polymorphism Is Not Associated with HPV Infection or Cervical Cancer in the Chinese Population

Ning Wang<sup>1</sup>, Duo Yin<sup>1</sup>, Shulan Zhang<sup>1\*</sup>, Heng Wei<sup>1</sup>, Shizhuo Wang<sup>1</sup>, Yang Zhang<sup>2</sup>, Yanming Lu<sup>1</sup>, Shuyan Dai<sup>1</sup>, Wei Li<sup>1</sup>, Qiao Zhang<sup>1</sup>, Yao Zhang<sup>1</sup>

**1** Department of Gynecology and Obstetrics, Shengjing Hospital of China Medical University, Shenyang, China, **2** Department of Breast Surgery, Shengjing Hospital of China Medical University, Shenyang, China

## Abstract

**Background:** While HPV infection is the main cause of cervical cancer, genetic susceptibility to HPV infection is not well understood. Tumor necrosis factor alpha (TNF-alpha), involved in the defense against HPV infection, plays an important role in cervical cancer progression and regression. The aim of this study was to investigate the relationship between the TNF-alpha rs1800629 polymorphism and risk of HPV infection or cervical cancer.

**Methods:** Three groups were involved in this study of Chinese women. Group 1 consisted of 285 high risk HPV positive cervical cancer patients, Group 2, 225 high risk HPV positive patients without cervical cancer, and Group 3, 318 HPV negative women with no cervical cancer. Blood samples were obtained from all patients and genotyped by PCR-RLFP. Fifty randomly selected samples were further sequenced.

**Results:** The allele and genotype distributions of the TNF-alpha rs1800629 polymorphism were not significantly different between each of the groups ( $P > 0.05$ ). There are no significant relationship between rs1800629 polymorphism and high risk HPV infection (OR = 0.649, 95% CI: 0.253–1.670,  $P = 0.371$ ), cervical cancer (OR = 0.993, 95% CI: 0.376–2.618,  $P = 0.988$ ), or cervical cancer with HPV infection (OR = 0.663, 95% CI: 0.250–1.758,  $P = 0.409$ ).

**Conclusions:** We demonstrated that there is no association between TNF rs1800629 polymorphism and the HPV infection, or cervical cancer with HPV infection.

**Citation:** Wang N, Yin D, Zhang S, Wei H, Wang S, et al. (2012) TNF-Alpha rs1800629 Polymorphism Is Not Associated with HPV Infection or Cervical Cancer in the Chinese Population. PLoS ONE 7(9): e45246. doi:10.1371/journal.pone.0045246

**Editor:** Cordula M. Stover, University of Leicester, United Kingdom

**Received:** June 20, 2012; **Accepted:** August 17, 2012; **Published:** September 13, 2012

**Copyright:** © 2012 Wang et al. This is an open-access article distributed under the terms of the Creative Commons Attribution License, which permits unrestricted use, distribution, and reproduction in any medium, provided the original author and source are credited.

**Funding:** This study was supported by the National Nature Science Foundation of China (No. 30973191), Science and Technology Program of Liaoning Province (No.2008225004), Peak Medical Construction Special Project of Liaoning Province (No.2010696), Science and Technology Program of Shenyang City (No.F11-262-9-15) and Free Researcher Project of Shengjing Hospital (No.200806). The funders had no role in study design, data collection and analysis, decision to publish, or preparation of the manuscript.

**Competing Interests:** The authors have declared that no competing interests exist.

\* E-mail: zsl0909@sina.com

## Introduction

Cervical cancer remains the second most common cancer among women worldwide [1]. Infection by an oncogenic human papillomavirus (HPV) is a risk factor for developing cervical cancer [2]. Immune responses to HPV infection within the cervical epithelium play an important role in the pathogenesis of cervical cancer.

Several cytokines that modulate the immunologic response have been implicated in the development of cancer [3]. Tumor necrosis factor-alpha (TNF- $\alpha$ ), secreted mainly by activated macrophages, is an extraordinarily pleiotropic cytokine with a central role in immune homeostasis, inflammation, and host defense [4,5]. TNF- $\alpha$  is involved in the defense against HPV infection, modulating viral replication [6].

The role of TNF- $\alpha$  in cancer is not well understood. Deregulated TNF expression within the tumor microenvironment appears to favor malignant cell tissue invasion, migration, and

ultimately metastasis formation [7]. There is also evidence, however, that TNF- $\alpha$  may promote the development and spread of the cancer [8,9]. The role of TNF- $\alpha$  in tumor promotion is supported by the TNF- $\alpha$ -deficient mouse model, in which TNF- $\alpha^{-/-}$  mice are resistant to the development of benign and malignant skin tumors. TNF modulation may contribute to regulation of cell inflammation, and the subsequent development of malignant disease [10]. Since the malignant development of cervical cancer is induced by persistent viral infection, we focus on the TNF gene, which may be involved in the susceptibility to HPV infection and development of cervical cancer.

TNF- $\alpha$  is regulated at the transcriptional level [11] and the rs1800629 polymorphisms within the TNF- $\alpha$  promoter region have been associated with the level of TNF- $\alpha$  [12]. The association of rs1800629 polymorphism and cervical cancer has been widely studied, but the results are contradictory [13,14,15,16]. The current study was conducted to investigate the distribution of

**Table 1.** Baseline clinical characteristics of involved groups.

|                 | Group 1 (n = 285) |        | Group 2 (n = 225) |        | Group 3 (n = 318) |        |
|-----------------|-------------------|--------|-------------------|--------|-------------------|--------|
|                 | No                | (%)    | No                | (%)    | No                | (%)    |
| Age             |                   |        |                   |        |                   |        |
| ≤35             | 57                | (20.0) | 53                | (23.6) | 78                | (24.5) |
| 36–50           | 161               | (56.5) | 136               | (60.4) | 174               | (54.7) |
| >50             | 67                | (23.5) | 36                | (16)   | 66                | (20.8) |
| Smoking         |                   |        |                   |        |                   |        |
| Never           | 270               | (94.7) | 208               | (92.4) | 307               | (96.5) |
| ever            | 15                | (5.3)  | 17                | (7.6)  | 11                | (3.5)  |
| HPV status      |                   |        |                   |        |                   |        |
| HPV+            | 285               | (100)  | 225               | (100)  | 0                 | (0)    |
| HPV–            | 0                 | (0)    | 0                 | (0)    | 318               | (100)  |
| Clinical stage* |                   |        |                   |        |                   |        |
| Stage 0         | 142               | (49.8) |                   |        |                   |        |
| Stage I         | 108               | (37.9) |                   |        |                   |        |
| Stage II        | 28                | (9.8)  |                   |        |                   |        |
| Stage III       | 6                 | (2.1)  |                   |        |                   |        |
| Stage IV        | 1                 | (0.4)  |                   |        |                   |        |

Note: \* According to the International Federation of Gynecology and Obstetrics classification.  
doi:10.1371/journal.pone.0045246.t001

rs1800629 polymorphism and its relationship with HPV infection and cervical cancer.

## Materials and Methods

### Study subjects

From 2008 to 2010, all patients treated at the Department of Obstetrics and Gynecology, Shengjing Hospital of China Medical University were evaluated for entry into this study. Patients were divided into 3 groups. Group 1 consisted of 285 patients diagnosed with cervical cancer and high risk HPV infection (including HPV 16, 18, 31, 33, 35, 39, 45, 51, 52, 56, 58, 59 and 68). Group 2 consisted of 225 patients diagnosed with high risk HPV infection, but without any abnormal cervical cytological or pathological change. Group 3 was composed of 318 healthy Chinese women presenting for routine healthy screening at our Health Check Center. Group 3 patients had no history of HPV infection, cervical

neoplastic disease, or evidence of cervical pathology. Patients in Group 3 had a normal cervical cytology on at least two consecutive annual examinations. Women with any history of malignant disease were excluded from Group 3. All patients were Chinese. Informed written consent and 5 ml of peripheral blood were obtained from each participant. The study protocol was approved by the Ethics Committee of Shengjing hospital. HPV status was detected as previously described [17].

### Genotyping of the rs1800629 polymorphism

Genomic DNA was extracted from peripheral blood leukocytes (Tiangen Blood Genome Kit). Genotyping was determined by polymerase chain reaction-restriction fragment length polymorphism (PCR-RFLP) analysis, which was based on the method of Cabrera et al. [18]. The PCR products from 50 random patient

**Table 2.** Allele and Genotype distribution in different groups.

|          | Group 1 (n = 570) |        | Group 2 (n = 450) |        | Group 3 (n = 636) |        |
|----------|-------------------|--------|-------------------|--------|-------------------|--------|
|          | No                | (%)    | No                | (%)    | No                | (%)    |
| Allele   |                   |        |                   |        |                   |        |
| G        | 524               | (91.9) | 404               | (89.8) | 583               | (91.7) |
| A        | 46                | (8.1)  | 46                | (10.2) | 53                | (8.3)  |
| Genotype |                   |        |                   |        |                   |        |
| GG       | 247               | (86.7) | 188               | (83.6) | 274               | (86.2) |
| GA       | 30                | (10.5) | 28                | (12.4) | 35                | (11.0) |
| AA       | 8                 | (2.8)  | 9                 | (4.0)  | 9                 | (2.8)  |

Note: G1–G2: comparison between Group 1 and Group 2; G2–G3: comparison between Group 2 and Group 3; G1–G3: comparison between Group 1 and Group 3; p value for test of HWE was 0.0013.  
doi:10.1371/journal.pone.0045246.t002

**Table 3.** ORs between Group 2 (HPV negative without cervical cancer) and Group 3 (HPV negative without cervical cancer).

| Genotype | Group 2 (n=225) | Group 3 (n=318) | OR* (95% CI)       | P     | OR* (95% CI)        | P     |
|----------|-----------------|-----------------|--------------------|-------|---------------------|-------|
|          | No. (%)         | No. (%)         |                    |       |                     |       |
| GG       | 188 (83.6)      | 274 (86.2)      | Reference          |       | 1.540(0.599–3.960)  | 0.371 |
| GA       | 28 (12.4)       | 35 (11.0)       | 0.880(0.516–1.502) | 0.640 | 1.356(0.473–3.889)  | 0.571 |
| AA       | 9 (4.0)         | 9 (2.8)         | 0.649(0.253–1.670) | 0.371 | reference           |       |
| GG+GA    | 216 (96.0)      | 309 (97.2)      | Reference          |       | 1.517 (0.591–3.893) | 0.386 |
| AA       | 9 (4.0)         | 9 (2.8)         | 0.659(0.257–1.692) | 0.386 | reference           |       |
| GA+AA    | 37 (16.4)       | 44 (13.8)       | Reference          |       | 0.822 (0.510–1.325) | 0.421 |
| GG       | 188 (83.6)      | 274 (86.2)      | 1.216(0.755–1.961) | 0.421 | reference           |       |

Note: \* Data were calculated by multivariate regression analysis, adjusting for age and smoking status.  
doi:10.1371/journal.pone.0045246.t003

samples were further sequenced to confirm the PCR-RFLP genotyping results.

### Statistical analysis

The association between *TNF- $\alpha$*  rs1800629 polymorphism and HPV infection and cervical cancer was estimated using odds ratio analysis (ORs) and their 95% CIs calculated by multivariate logistic regression. All the ORs were adjusted for age and smoking status. Hardy-Weinberg equilibrium analysis was performed with the Chi-square test. The Chi-square test was used to compare variables. A p-value of 0.05 was used as the criterion of statistical significance. All analyses were conducted using SPSS software (version 13.0; SPSS, Inc., Chicago, IL).

### Results

The basic clinical characteristics of the three groups are summarized in Table 1. The distribution of age and smoking was not significantly different between the 3 groups ( $P = 0.224$  and  $0.108$ , respectively). Patients in the cervical cancer group (Group 1) were all HPV positive. Cervical cancer was staged according to the International Federation of Gynecology and Obstetrics classification and 49.8, 37.9, 9.8 and 2.1% of patients had stage 0, I, II and III diseases, respectively. Only 1 patient had stage IV cervical cancer. As defined, patients in Group 2 were all HPV positive and had no abnormal cervical findings.

The PCR-RFLP analysis results of 50 random samples were all confirmed by sequencing (Fig. S1). The genotype frequencies in all

groups did not conform to the Hardy-Weinberg equilibrium ( $P = 0.0013$ ). The allelic frequencies of the A allele in Groups 1, 2 and 3 were 8.1, 10.2 and 8.3%, respectively. No significant differences of allelic frequencies were found between groups ( $P_{G1-G2} = 0.271$ ,  $P_{G2-G3} = 0.287$  and  $P_{G1-G3} = 0.916$ , Table 2). No significant difference of genotype distribution was observed between the groups ( $P_{G1-G2} = 0.551$ ,  $P_{G2-G3} = 0.627$  and  $P_{G1-G3} = 0.980$ , Table 2). There was no difference in the distribution of genotypes among patients with different clinical stages of cervical cancer (Group 1) ( $P = 0.575$ ).

In further multivariate regression analysis, no significant association was observed in the comparison of genotypes after adjusting for age, smoking, and HPV infection status. Comparing Groups 2 and 3, we found no significant relationship between *TNF* rs1800629 polymorphism and HPV infection (AA vs. GG: OR = 0.649, 95% CI: 0.253–1.670,  $P = 0.371$ , Table 3). Comparing Groups 1 and 3, we found there was no significant relationship between *TNF* rs1800629 polymorphism and cervical cancer (AA vs. GG: OR = 0.993, 95% CI: 0.376–2.618,  $P = 0.988$ , Table 4). Comparing Groups 1 and 2, we found no significant association between *TNF* rs1800629 polymorphism and cervical cancer with HPV infection (AA vs. GG: OR = 0.663, 95% CI: 0.250–1.758,  $P = 0.409$ , Table 5). No associations were found in combined genotypes (AA vs. GG+GA or GG vs. GA+AA) with cervical cancer risk (Table 3–5).

**Table 4.** ORs comparison between Group 1 (cervical cancer) and Group 3 (HPV negative with no cervical cancer).

| Genotype | Group 1 (n=285) | Group 3 (n=318) | OR* (95% CI)       | P     | OR* (95% CI)        | P     |
|----------|-----------------|-----------------|--------------------|-------|---------------------|-------|
|          | No. (%)         | No. (%)         |                    |       |                     |       |
| GG       | 247 (86.7)      | 274 (86.2)      | reference          |       | 1.007(0.382–2.657)  | 0.988 |
| GA       | 30 (10.5)       | 35 (11.0)       | 0.932(0.554–1.567) | 0.790 | 0.791(0.321–2.747)  | 0.908 |
| AA       | 8 (2.8)         | 9 (2.8)         | 0.993(0.376–2.618) | 0.988 | reference           |       |
| GG+GA    | 277 (97.2)      | 309 (97.2)      | reference          |       | 1.000 (0.380–2.632) | 1.000 |
| AA       | 8 (2.8)         | 9 (2.8)         | 1.000(0.380–2.634) | 1.000 | reference           |       |
| GA+AA    | 38 (13.3)       | 44 (13.8)       | reference          |       | 0.944 (0.591–1.509) | 0.811 |
| GG       | 247 (86.7)      | 274 (86.2)      | 1.059(0.663–1.692) | 0.811 | reference           |       |

Note: \* Data were calculated by multivariate regression analysis, adjusting for age and smoking status.  
doi:10.1371/journal.pone.0045246.t004

**Table 5.** ORs comparison between Group 1 (cervical cancer) and Group 2 (HPV positive without cervical cancer).

| Genotype | Group 1 (n = 285)<br>No. (%) | Group 2 (n = 225)<br>No. (%) | OR* (95% CI)        | P     | OR* (95% CI)        | P     |
|----------|------------------------------|------------------------------|---------------------|-------|---------------------|-------|
| GG       | 247 (86.7)                   | 188 (83.6)                   | Reference           |       | 1.508(0.569–3.998)  | 0.409 |
| GA       | 30 (10.5)                    | 28 (12.4)                    | 0.785(0.451–1.368)  | 0.393 | 1.184(0.398–3.523)  | 0.761 |
| AA       | 8 (2.8)                      | 9 (4.0)                      | 0.663(0.250–1.758)  | 0.409 | reference           |       |
| GG+GA    | 277 (97.2)                   | 216 (96.0)                   | Reference           |       | 1.468 (0.555–3.882) | 0.439 |
| AA       | 8 (2.8)                      | 9 (4.0)                      | 0.681(0.258–1.802)  | 0.439 | reference           |       |
| GA+AA    | 38 (13.3)                    | 37 (16.4)                    | Reference           |       | 0.755 (0.460–1.239) | 0.266 |
| GG       | 247 (86.7)                   | 188 (83.6)                   | 1.324 (0.807–2.173) | 0.266 | reference           |       |

Note: \*Data were calculated by multivariate regression analysis, adjusting for age, smoking status and HPV status.  
doi:10.1371/journal.pone.0045246.t005

## Discussion

In this study, we evaluated patients with high risk HPV and cervical cancer (Group 1), with high risk HPV and no cervical cancer (Group 2), and with neither high risk HPV or cervical cancer (Group 3). We evaluated the relationship between rs1800629 polymorphisms and HPV infection and cervical cancer. We did not observe a significant relationship between rs1800629 polymorphisms and cervical cancer or HPV infection.

Although several studies have indicated that polymorphisms in the promoter region of rs1800629 may be a contributing factor to the development of cervical cancer [14,15,19,20,21], the results have been contradictory. It is not clear why studies upon identical malignancies produced divergent results. Differences between study design, investigated populations, and analytic method used may have contributed to these inconsistencies. Large prospective studies with matched case-control studies are needed to better elucidate the precise role of the TNF rs1800629 polymorphism in cervical cancer.

Our findings are similar to those reported by Stanczuk et al. [15] and Govan et al. [16], who demonstrated no significant association between rs1800629 polymorphism and cervical cancer. Our findings of genotype distribution and HPV infection risk are supported by Deshpande et al. [14], who investigated the association of rs1800629 polymorphism with HPV 16 infection. However, their studies were based on a small sample size and might not have had sufficient statistical power to detect a difference. Although we have a large sample size, we were unable to confirm the possible genetic susceptibility of this SNP site.

Kirkpatrick et al. [22] demonstrated that cervical neoplasia was influenced by rs1800629 genotype. Since the cervical neoplasia tended to regress or progress spontaneously [23], it could affect the evaluation of risk of developing cervical cancer. Longer follow-up would have improved this detection rate.

The ethnic background in a population based genetic susceptibility study is also an important factor affecting the results. The genotype distribution of rs1800629 in our Chinese patients was similar to that reported in Indian [21], Korean [24] and Costa Rica Caucasian [25] populations, while our genotype distribution was slightly different from South Africa [15] and Zimbabwean [15] African, and USA [13,23] and Mexico [14]. Caucasian populations. In a meta-analysis, Liu et al. [26] observed that the association between the rs1800629 AA homozygous genotype and cervical cancer was more significant in Asians. However, the studies groups cited by Liu et al. [26] were relatively small and under-powered.

Environmental exposures may also play an important role in these inconsistent results. Geographic variations in HPV type [27] may contribute to the different cervical cancer risks and alter the effect of rs1800629 polymorphism. However, our results did not support the relationship between HPV infection and rs1800629 polymorphism in the Chinese population.

One limitation of the present study was that it was a hospital-based, case control study. Patients were selected from a single institution and thus may not have been representative of cervical cancer patients in the general population. Control subjects were selected from the same hospital, also possibly introducing a selection bias. However, the distribution of rs1800629 genotype frequencies in our patients was similar to other reports [28] of the Chinese population, which suggested there was no selection bias.

TNF- $\alpha$  rs1800629 allele A tend to increase the expression of TNF- $\alpha$  [12], but evolution pressure seems to lower the frequency of high TNF- $\alpha$  producer, allele A, to reduce the mortality induced by high level of TNF- $\alpha$ . Considering our results, we postulate that in the immune compromised complex microbial vaginal environment, TNF- $\alpha$  doesn't play an important role in both HPV eliminating and HPV-related transformation. And in the progression of multiple factors induced cancer, the duality of TNF- $\alpha$  determine that it doesn't have decisive influence in cervical cancer.

## Conclusion

In our study, we found no association between TNF rs1800629 polymorphism and HPV infection, or cervical cancer with HPV infection.

## Supporting Information

**Figure S1 PCR-RFLP analysis and sequencing of TNF-alpha rs1800629 genotype.** (A) PCR-RFLP analysis results (electrophoresis on 3% Gel) (B) Sequencing results by ABI 3700. (TIF)

## Acknowledgments

We thank the members of Department of Key Laboratory of Congenital Malformation Ministry of Health for their technical assistance. We also thank Chunxue Lu for her generous help on sample collection and clinical work with patients with cervical disease.

## Author Contributions

Conceived and designed the experiments: NW DY SZ. Performed the experiments: HW SW YZ WL. Analyzed the data: YL SD. Contributed reagents/materials/analysis tools: YZ. Wrote the paper: QZ.

## References

- Jemal A, Bray F, Center MM, Ferlay J, Ward E, et al. (2011) Global cancer statistics. *CA Cancer J Clin* 61: 69–90.
- Bosch FX, Lorincz A, Munoz N, Meijer CJ, Shah KV (2002) The causal relation between human papillomavirus and cervical cancer. *J Clin Pathol* 55: 244–265.
- Dranoff G (2004) Cytokines in cancer pathogenesis and cancer therapy. *Nat Rev Cancer* 4: 11–22.
- Wajant H (2009) The role of TNF in cancer. *Results Probl Cell Differ* 49: 1–15.
- Elahi MM, Asotra K, Matata BM, Mastana SS (2009) Tumor necrosis factor alpha -308 gene locus promoter polymorphism: an analysis of association with health and disease. *Biochim Biophys Acta* 1792: 163–172.
- zur Hausen H (2000) Papillomaviruses causing cancer: evasion from host-cell control in early events in carcinogenesis. *J Natl Cancer Inst* 92: 690–698.
- Polunovsky VA, Wendt CH, Ingbar DH, Peterson MS, Bitterman PB (1994) Induction of endothelial cell apoptosis by TNF alpha: modulation by inhibitors of protein synthesis. *Exp Cell Res* 214: 584–594.
- Ardizzoia A, Lissoni P, Brivio F, Tisi E, Perego MS, et al. (1992) Tumor necrosis factor in solid tumors: increased blood levels in the metastatic disease. *J Biol Regul Homeost Agents* 6: 103–107.
- Abrahamsson J, Carlsson B, Mellander L (1993) Tumor necrosis factor-alpha in malignant disease. *Am J Pediatr Hematol Oncol* 15: 364–369.
- Mocellin S, Nitti D (2008) TNF and cancer: the two sides of the coin. *Front Biosci* 13: 2774–2783.
- Raabe T, Bukrinsky M, Currie RA (1998) Relative contribution of transcription and translation to the induction of tumor necrosis factor-alpha by lipopolysaccharide. *J Biol Chem* 273: 974–980.
- Kroeger KM, Carville KS, Abraham LJ (1997) The -308 tumor necrosis factor-alpha promoter polymorphism affects transcription. *Mol Immunol* 34: 391–399.
- Calhoun ES, McGovern RM, Janney CA, Cerhan JR, Iturria SJ, et al. (2002) Host genetic polymorphism analysis in cervical cancer. *Clin Chem* 48: 1218–1224.
- Deshpande A, Nolan JP, White PS, Valdez YE, Hunt WC, et al. (2005) TNF-alpha promoter polymorphisms and susceptibility to human papillomavirus 16-associated cervical cancer. *J Infect Dis* 191: 969–976.
- Stanczuk GA, Sibanda EN, Tswana SA, Bergstrom S (2003) Polymorphism at the -308-promoter position of the tumor necrosis factor-alpha (TNF-alpha) gene and cervical cancer. *Int J Gynecol Cancer* 13: 148–153.
- Govan VA, Constant D, Hoffman M, Williamson AL (2006) The allelic distribution of -308 Tumor Necrosis Factor-alpha gene polymorphism in South African women with cervical cancer and control women. *BMC Cancer* 6: 24.
- Liu X, Zhang S, Ruan Q, Ji Y, Ma L, et al. Prevalence and type distribution of human papillomavirus in women with cervical lesions in Liaoning Province, China. *Int J Gynecol Cancer* 20: 147–153.
- Cabrera M, Shaw MA, Sharples C, Williams H, Castes M, et al. (1995) Polymorphism in tumor necrosis factor genes associated with mucocutaneous leishmaniasis. *J Exp Med* 182: 1259–1264.
- Azar KK, Tani M, Yasuda H, Sakai A, Inoue M, et al. (2004) Increased secretion patterns of interleukin-10 and tumor necrosis factor-alpha in cervical squamous intraepithelial lesions. *Hum Pathol* 35: 1376–1384.
- Ivansson EL, Juko-Pecirep I, Gyllensten UB (2010) Interaction of immunological genes on chromosome 2q33 and IFNG in susceptibility to cervical cancer. *Gynecol Oncol* 116: 544–548.
- Singh H, Jain M, Sachan R, Mittal B (2009) Association of TNFA (-308G>A) and IL-10 (-819C>T) promoter polymorphisms with risk of cervical cancer. *Int J Gynecol Cancer* 19: 1190–1194.
- Kirkpatrick A, Bidwell J, van den Brule AJ, Meijer CJ, Pawade J, et al. (2004) TNFalpha polymorphism frequencies in HPV-associated cervical dysplasia. *Gynecol Oncol* 92: 675–679.
- Gostout BS, Poland GA, Calhoun ES, Sohni YR, Giuntoli RL 2nd, et al. (2003) TAP1, TAP2, and HLA-DR2 alleles are predictors of cervical cancer risk. *Gynecol Oncol* 88: 326–332.
- Jang WH, Yang YI, Yea SS, Lee YJ, Chun JH, et al. (2001) The -238 tumor necrosis factor-alpha promoter polymorphism is associated with decreased susceptibility to cancers. *Cancer Lett* 166: 41–46.
- Wang SS, Bratti MC, Rodriguez AC, Herrero R, Burk RD, et al. (2009) Common variants in immune and DNA repair genes and risk for human papillomavirus persistence and progression to cervical cancer. *J Infect Dis* 199: 20–30.
- Liu L, Yang X, Chen X, Kan T, Shen Y, et al. (2011) Association between TNF-alpha polymorphisms and cervical cancer risk: a meta-analysis. *Mol Biol Rep.*
- Li N, Franceschi S, Howell-Jones R, Snijders PJ, Clifford GM (2011) Human papillomavirus type distribution in 30,848 invasive cervical cancers worldwide: Variation by geographical region, histological type and year of publication. *Int J Cancer* 128: 927–935.
- Lu W, Pan K, Zhang L, Lin D, Miao X, et al. (2005) Genetic polymorphisms of interleukin (IL)-1B, IL-1RN, IL-8, IL-10 and tumor necrosis factor {alpha} and risk of gastric cancer in a Chinese population. *Carcinogenesis* 26: 631–636.
